# Supplementary material
Source: publisher figshare collection journal article supplement (https://sage.figshare.com/ndownloader/files/22107822)
Supplement: Supplementary file 1 [file 22107822]

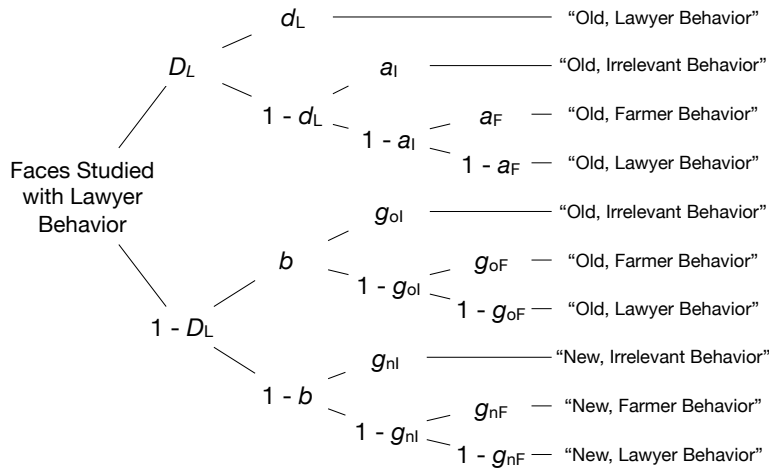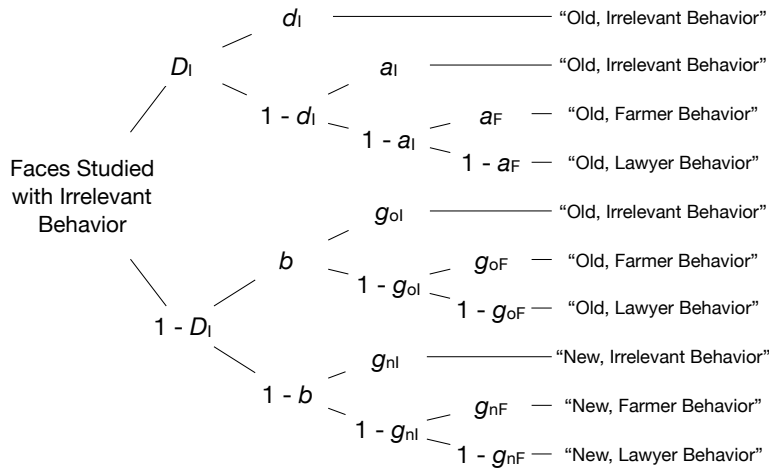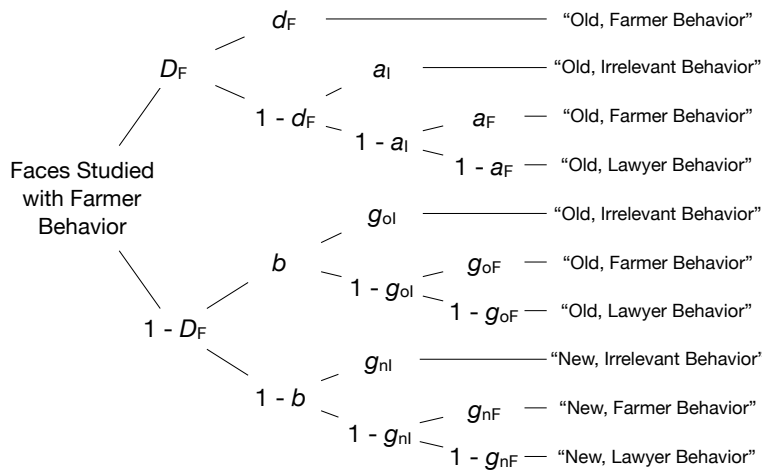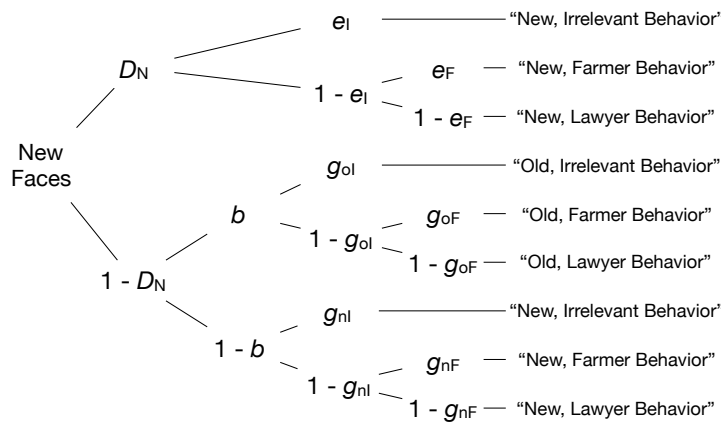

**Supplementary Figure.** The extended source monitoring model with new parameters reflecting source guessing for detected new items. Each processing tree represents the cognitive processes that occur in response to a specific item. The rectangles on the right side represent the participants' responses in the source monitoring test. Letters along the links represent the cognitive processes that lead to these answers ( $D$ . = recognition of an item as old or new,  $d$ . = source memory,  $b$  = guessing old,  $a$ . = source guessing for detected old items,  $g_{o\bullet}$  = source guessing for undetected items classified as old,  $g_{n\bullet}$  = source guessing for undetected items classified as new,  $e$ . = source guessing for detected new items).
